# Supplementary material for: The deubiquitinase USP44 promotes Treg function during inflammation by preventing FOXP3 degradation
Source: PubMed Central journal article supplement (PMC7507386; doi:10.15252/embr.202050308), 2020-07-09

# Figure 3

## Figure 3A

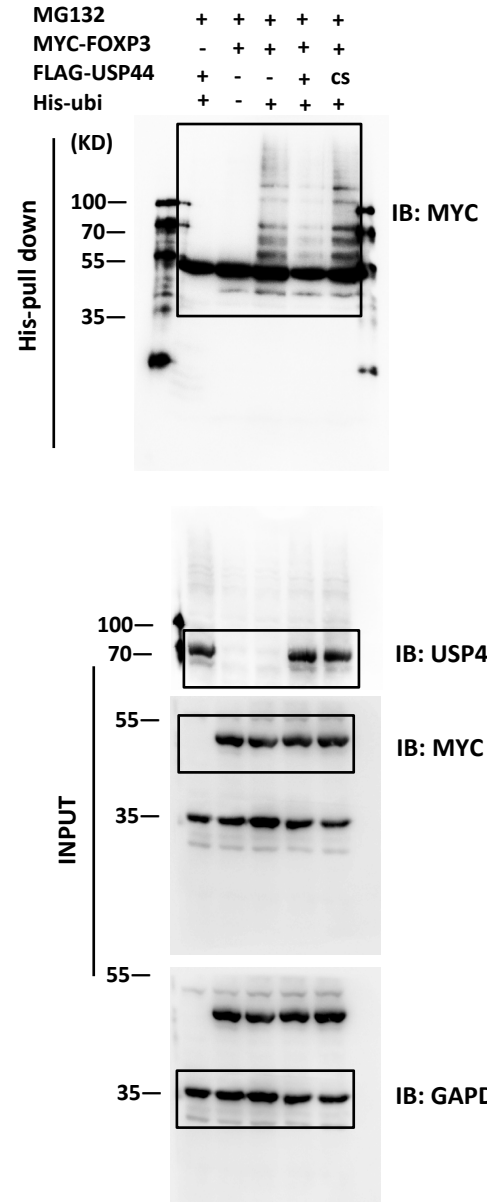

## Figure 3B

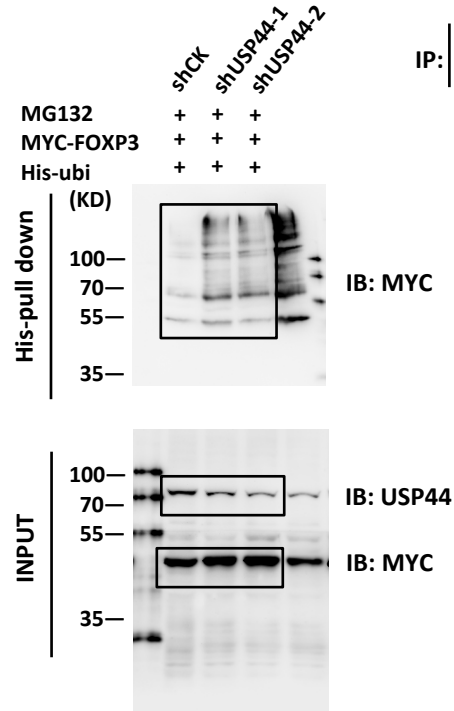

## Figure 3C

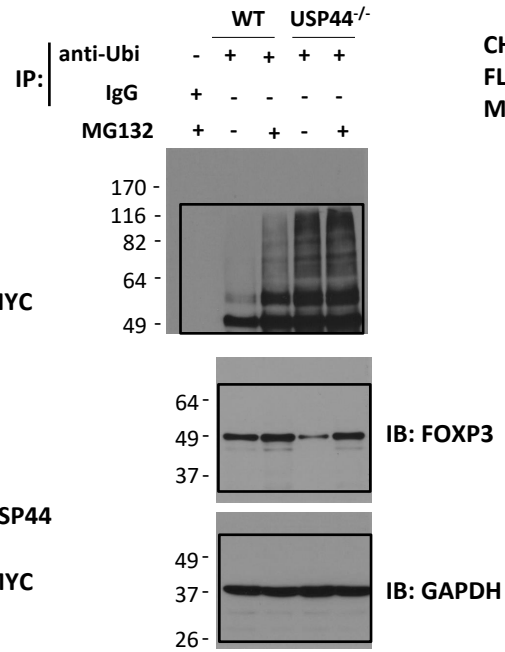

## Figure 3D

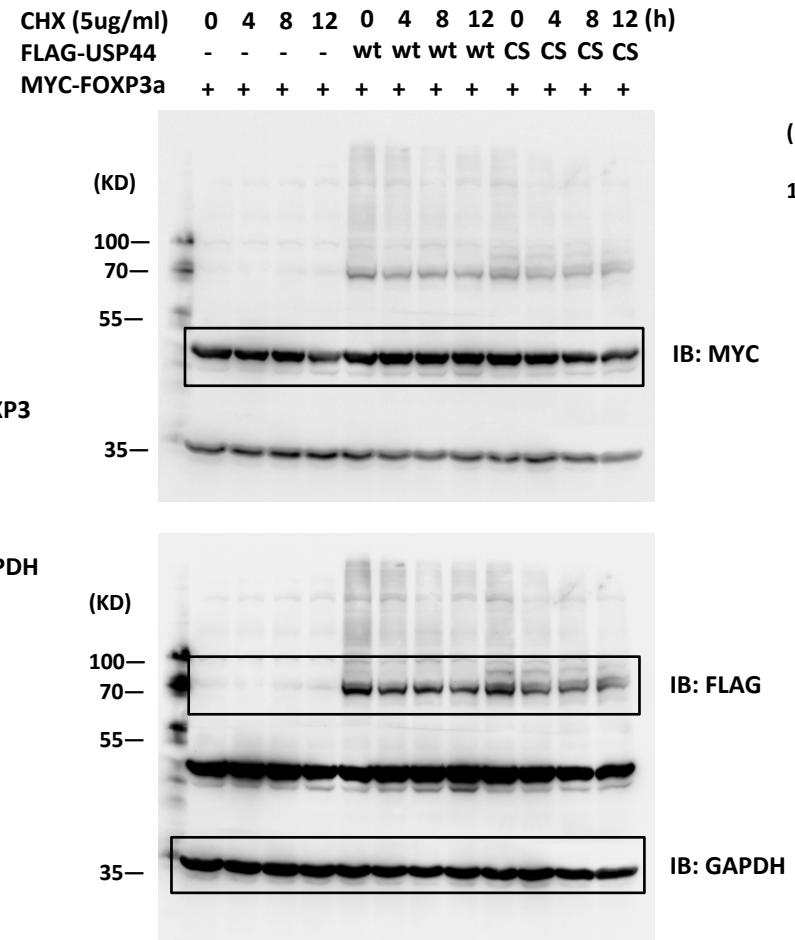

## Figure 3F

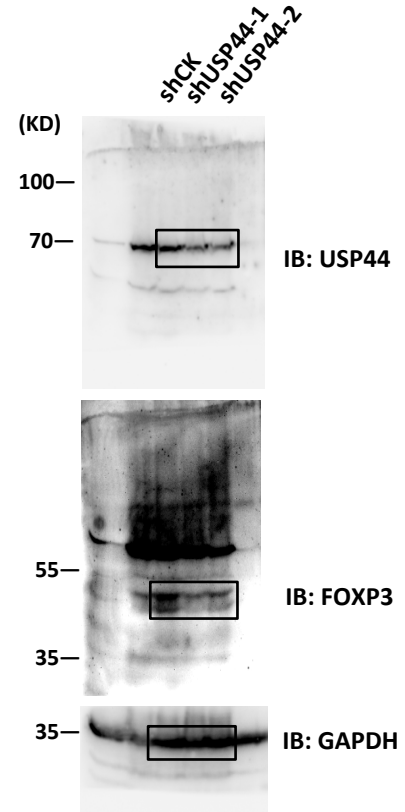

Supplement: EMBR-21-e50308-s005.pdf [file EMBR-21-e50308-s005.pdf]
