# Supplementary material for: The deubiquitinase USP44 promotes Treg function during inflammation by preventing FOXP3 degradation
Source: PubMed Central journal article supplement (PMC7507386; doi:10.15252/embr.202050308), 2020-07-09

# Figure 4

## Figure 4A left

MYC-USP44 + - +  
FLAG-USP7 - + +

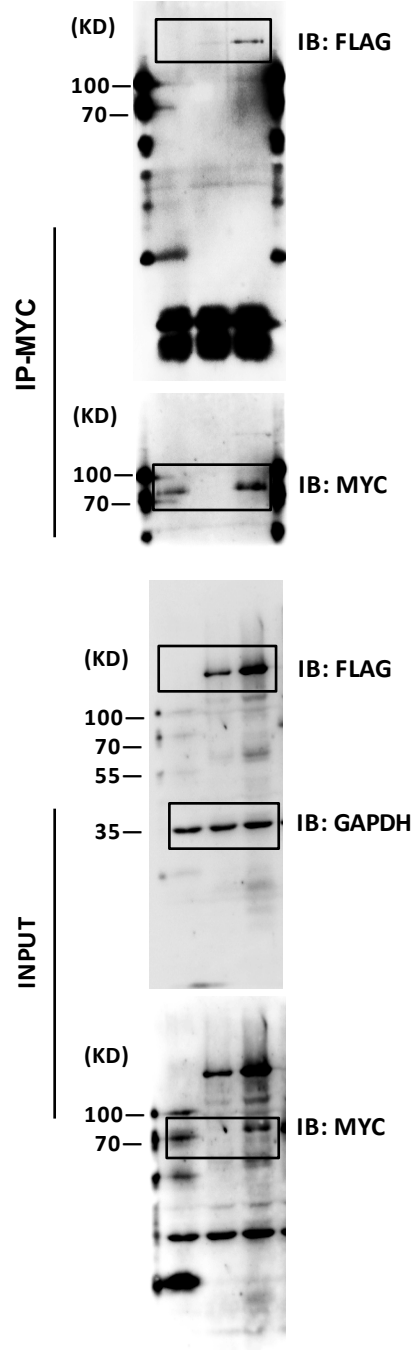

## Figure 4A right

MYC-USP44 + - +  
FLAG-USP7 - + +

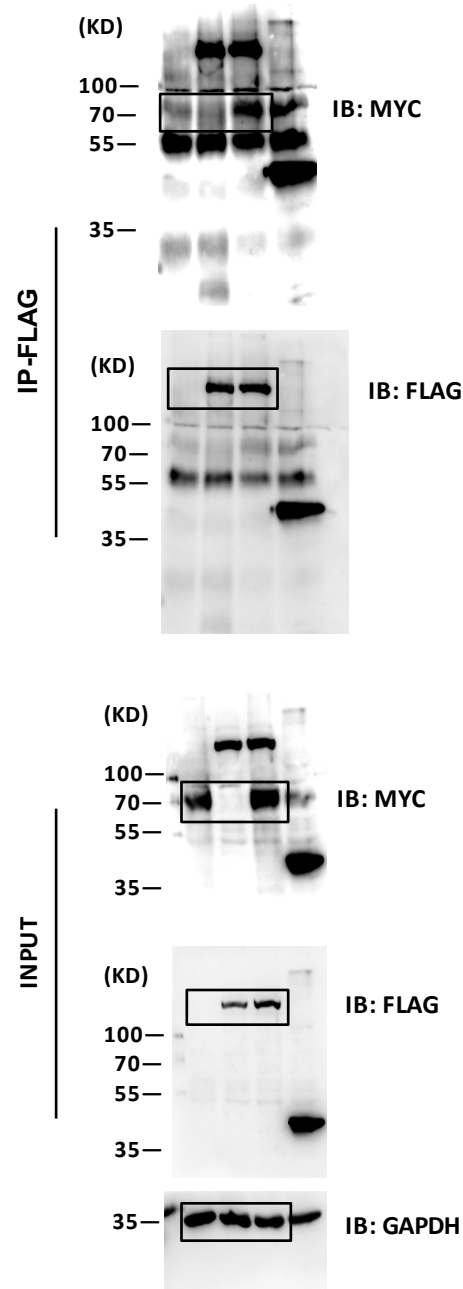

## Figure 4B

MYC-FOXP3 + + + + + +  
FLAG-USP7 - + - + + +  
PLVX-USP44 - - +

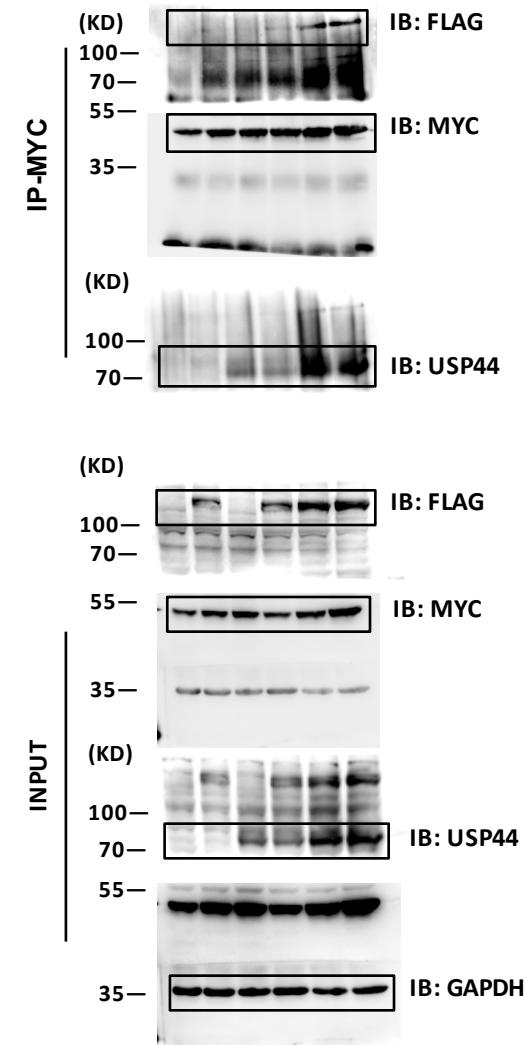

## Figure 4C

MG132 + + + + +  
MYC-FOXP3 + + + + +  
FLAG-USP44 - - + - +  
FLAG-USP7 - - - + +  
His-Ubi - + + + +

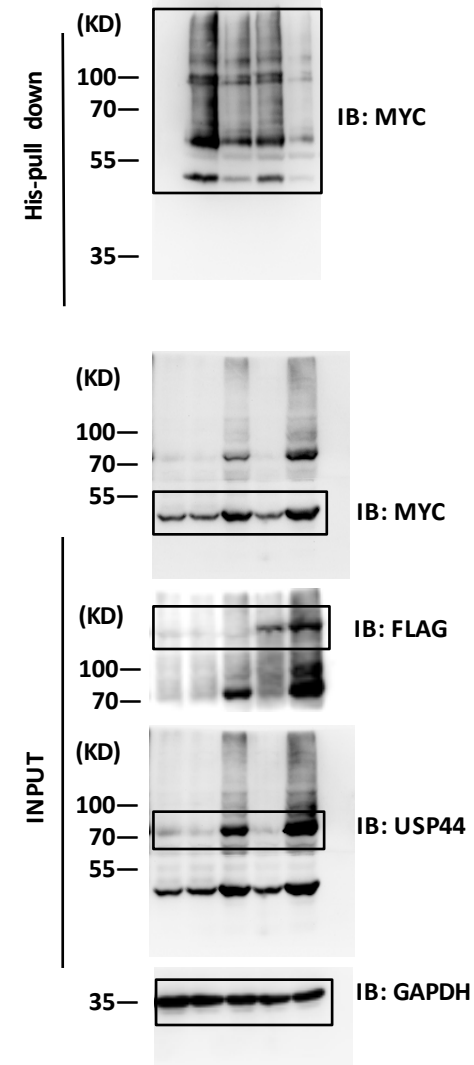

## Figure 4D

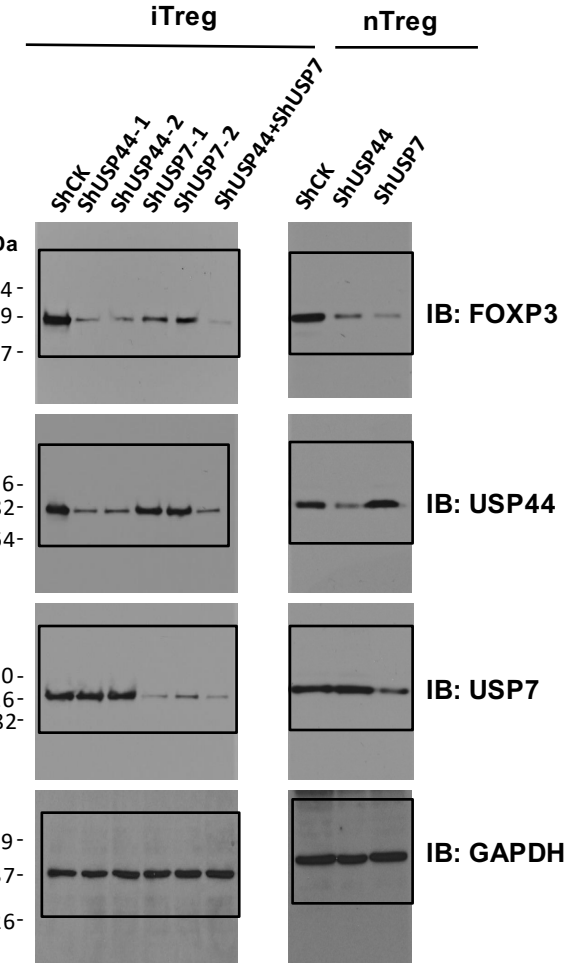

Supplement: EMBR-21-e50308-s006.pdf [file EMBR-21-e50308-s006.pdf]
